# Supplementary material for: Evidence of selection as a cause for racial disparities in fibroproliferative disease
Source: PubMed Central journal article supplement (PMC5549739; doi:10.1371/journal.pone.0182791), 2017-08-08
Supplement: pone.0182791.s001.pdf [file pone.0182791.s001.pdf]

| SNP        | Disease            | Chromosome | Position (hg19) | Risk Allele | Other Allele |
|------------|--------------------|------------|-----------------|-------------|--------------|
| rs880315   | Hypertension       | 1          | 10796866        | C           | T            |
| rs17367504 | Hypertension       | 1          | 11862778        | G           | A            |
| rs2275247  | Systemic sclerosis | 1          | 35908451        | C           | T            |
| rs3753841  | Glaucoma           | 1          | 103379918       | G           | A            |
| rs12136063 | Nephrosclerosis    | 1          | 110014170       | A           | G            |
| rs10745332 | Hypertension       | 1          | 113189053       | A           | G            |
| rs17030613 | Hypertension       | 1          | 113190807       | C           | A            |
| rs267734   | Nephrosclerosis    | 1          | 150951477       | T           | C            |
| rs2049805  | Nephrosclerosis    | 1          | 155194980       | C           | T            |
| rs4656461  | Glaucoma           | 1          | 165687205       | G           | A            |
| rs3850625  | Nephrosclerosis    | 1          | 201016296       | G           | A            |
| rs873549   | Keloid             | 1          | 222271767       | C           | T            |
| rs2802729  | Nephrosclerosis    | 1          | 243501763       | A           | C            |
| rs807601   | Nephrosclerosis    | 2          | 15793014        | T           | G            |
| rs6431731  | Nephrosclerosis    | 2          | 15863002        | C           | T            |
| rs1260326  | Nephrosclerosis    | 2          | 27730940        | T           | C            |
| rs3213787  | Glaucoma           | 2          | 45646824        | A           | G            |
| rs7583877  | Nephrosclerosis    | 2          | 100460654       | C           | T            |
| rs11123170 | Nephrosclerosis    | 2          | 113978940       | G           | C            |
| rs17830558 | Nephrosclerosis    | 2          | 160878364       | T           | G            |
| rs16849225 | Hypertension       | 2          | 164906820       | C           | T            |
| rs1446468  | Hypertension       | 2          | 164963486       | T           | C            |
| rs4667594  | Nephrosclerosis    | 2          | 170008506       | A           | T            |
| rs4972593  | Nephrosclerosis    | 2          | 174462854       | A           | T            |
| rs7601754  | Systemic sclerosis | 2          | 191940451       | A           | G            |
| rs2712184  | Nephrosclerosis    | 2          | 217682779       | A           | C            |
| rs6795744  | Nephrosclerosis    | 3          | 13906850        | A           | G            |
| rs820430   | Hypertension       | 3          | 27548900        | A           | G            |
| rs1717027  | Hypertension       | 3          | 41987920        | T           | C            |
| rs319690   | Hypertension       | 3          | 47927484        | C           | T            |
| rs9810888  | Hypertension       | 3          | 53635595        | G           | T            |
| rs13069000 | Nephrosclerosis    | 3          | 66798950        | G           | C            |
| rs1511412  | Keloid             | 3          | 138713704       | A           | G            |
| rs16833934 | Hypertension       | 3          | 163737250       | G           | A            |
| rs419076   | Hypertension       | 3          | 169100886       | T           | C            |
| rs16853722 | Nephrosclerosis    | 3          | 169150632       | C           | T            |
| rs9682041  | Nephrosclerosis    | 3          | 170091902       | C           | T            |
| rs6445055  | Glaucoma           | 3          | 171992387       | A           | G            |
| rs10513801 | Nephrosclerosis    | 3          | 185822353       | T           | G            |
| rs10937329 | Nephrosclerosis    | 3          | 187713718       | T           | A            |
| rs4619890  | Glaucoma           | 4          | 7853160         | G           | A            |
| rs3775948  | Nephrosclerosis    | 4          | 9995182         | C           | G            |
| rs871606   | Hypertension       | 4          | 54799245        | T           | C            |
| rs10032549 | Nephrosclerosis    | 4          | 77398015        | G           | A            |
| rs1902859  | Hypertension       | 4          | 81157703        | C           | T            |
| rs2725220  | Nephrosclerosis    | 4          | 88959922        | C           | G            |

| SNP        | Disease            | Chromosome | Position (hg19) | Risk Allele | Other Allele |
|------------|--------------------|------------|-----------------|-------------|--------------|
| rs228611   | Nephrosclerosis    | 4          | 103561709       | G           | A            |
| rs1173771  | Hypertension       | 5          | 32815028        | G           | A            |
| rs11959928 | Nephrosclerosis    | 5          | 39397132        | A           | T            |
| rs2233287  | Systemic sclerosis | 5          | 150440097       | A           | G            |
| rs9313772  | Hypertension       | 5          | 157804457       | C           | T            |
| rs6420094  | Nephrosclerosis    | 5          | 176817636       | A           | G            |
| rs2745572  | Glaucoma           | 6          | 1548369         | G           | A            |
| rs11969985 | Glaucoma           | 6          | 1922907         | G           | A            |
| rs198846   | Hypertension       | 6          | 26107463        | G           | A            |
| rs7759001  | Nephrosclerosis    | 6          | 27341409        | G           | A            |
| rs3130573  | Systemic sclerosis | 6          | 31106268        | G           | A            |
| rs3828890  | Nephrosclerosis    | 6          | 31440669        | G           | C            |
| rs805303   | Hypertension       | 6          | 31616366        | G           | A            |
| rs443198   | Systemic sclerosis | 6          | 32190406        | G           | A            |
| rs9296015  | Systemic sclerosis | 6          | 32218989        | A           | G            |
| rs9272729  | Nephrosclerosis    | 6          | 32609594        | A           | G            |
| rs881858   | Nephrosclerosis    | 6          | 43806609        | A           | G            |
| rs13209747 | Hypertension       | 6          | 127115454       | T           | C            |
| rs1936800  | Nephrosclerosis    | 6          | 127436064       | T           | C            |
| rs17080102 | Hypertension       | 6          | 151004770       | G           | C            |
| rs2279463  | Nephrosclerosis    | 6          | 160668389       | A           | G            |
| rs316009   | Nephrosclerosis    | 6          | 160675764       | T           | C            |
| rs10277115 | Nephrosclerosis    | 7          | 1285195         | T           | A            |
| rs59072263 | Glaucoma           | 7          | 8152067         | G           | T            |
| rs17428471 | Hypertension       | 7          | 27337867        | T           | G            |
| rs3750082  | Nephrosclerosis    | 7          | 32919927        | T           | A            |
| rs6465825  | Nephrosclerosis    | 7          | 77416439        | T           | C            |
| rs7801190  | Hypertension       | 7          | 100458093       | C           | G            |
| rs17477177 | Hypertension       | 7          | 106411858       | T           | C            |
| rs10258482 | Glaucoma           | 7          | 116150095       | A           | C            |
| rs7805747  | Nephrosclerosis    | 7          | 151407801       | A           | G            |
| rs6459680  | Nephrosclerosis    | 7          | 156258568       | T           | G            |
| rs1015213  | Glaucoma           | 8          | 52887541        | T           | C            |
| rs284491   | Glaucoma           | 8          | 105958633       | T           | C            |
| rs2071518  | Hypertension       | 8          | 120435812       | T           | C            |
| rs7827545  | Hypertension       | 8          | 135566567       | T           | C            |
| rs4744712  | Nephrosclerosis    | 9          | 71434707        | C           | A            |
| rs2487032  | Glaucoma           | 9          | 107703934       | A           | G            |
| rs8176743  | Glaucoma           | 9          | 136131415       | T           | C            |
| rs1044261  | Nephrosclerosis    | 10         | 1065710         | C           | T            |
| rs10795433 | Nephrosclerosis    | 10         | 16969923        | A           | C            |
| rs4373814  | Hypertension       | 10         | 18419972        | C           | G            |
| rs11014166 | Hypertension       | 10         | 18708798        | A           | T            |
| rs10994860 | Nephrosclerosis    | 10         | 52645424        | T           | C            |
| rs1530440  | Hypertension       | 10         | 63524591        | T           | C            |
| rs9663362  | Hypertension       | 10         | 95895177        | G           | C            |

| SNP        | Disease            | Chromosome | Position (hg19) | Risk Allele | Other Allele |
|------------|--------------------|------------|-----------------|-------------|--------------|
| rs12416687 | Hypertension       | 10         | 104629011       | T           | C            |
| rs7913069  | Uterine fibroids   | 10         | 105714399       | T           | C            |
| rs2782980  | Hypertension       | 10         | 115781527       | C           | T            |
| rs2280543  | Uterine fibroids   | 11         | 203788          | C           | T            |
| rs163160   | Nephrosclerosis    | 11         | 2789955         | A           | G            |
| rs7129220  | Hypertension       | 11         | 10350538        | A           | G            |
| rs381815   | Hypertension       | 11         | 16902268        | C           | T            |
| rs11024102 | Glaucoma           | 11         | 17008605        | C           | T            |
| rs10767873 | Nephrosclerosis    | 11         | 30768678        | C           | T            |
| rs12419342 | Glaucoma           | 11         | 47468545        | C           | T            |
| rs747782   | Glaucoma           | 11         | 47940925        | C           | T            |
| rs479777   | Sarcoidosis        | 11         | 64107477        | T           | C            |
| rs504915   | Nephrosclerosis    | 11         | 64464085        | T           | A            |
| rs4014195  | Nephrosclerosis    | 11         | 65506822        | C           | G            |
| rs633185   | Hypertension       | 11         | 100593538       | G           | C            |
| rs11222084 | Hypertension       | 11         | 130273230       | T           | A            |
| rs1106766  | Nephrosclerosis    | 12         | 57809456        | T           | C            |
| rs626277   | Nephrosclerosis    | 13         | 72347696        | C           | A            |
| rs17536527 | Nephrosclerosis    | 15         | 45719187        | C           | G            |
| rs491567   | Nephrosclerosis    | 15         | 53946593        | C           | A            |
| rs8032158  | Keloid             | 15         | 56194877        | C           | T            |
| rs3825942  | Glaucoma           | 15         | 74219582        | A           | G            |
| rs893818   | Glaucoma           | 15         | 74229195        | A           | G            |
| rs6495122  | Hypertension       | 15         | 75125645        | A           | C            |
| rs7172677  | Systemic sclerosis | 15         | 75424593        | A           | C            |
| rs1394125  | Nephrosclerosis    | 15         | 76158983        | A           | G            |
| rs2521501  | Hypertension       | 15         | 91437388        | T           | A            |
| rs12437854 | Nephrosclerosis    | 15         | 94141833        | G           | T            |
| rs13329952 | Nephrosclerosis    | 16         | 20366507        | T           | C            |
| rs11864909 | Nephrosclerosis    | 16         | 20400839        | C           | T            |
| rs889472   | Nephrosclerosis    | 16         | 79645989        | C           | A            |
| rs12711490 | Systemic sclerosis | 16         | 85973028        | T           | C            |
| rs164748   | Nephrosclerosis    | 16         | 89708292        | C           | G            |
| rs11656696 | Glaucoma           | 17         | 10033679        | A           | C            |
| rs2453580  | Nephrosclerosis    | 17         | 19438321        | T           | C            |
| rs7208487  | Nephrosclerosis    | 17         | 37543449        | T           | G            |
| rs12946454 | Hypertension       | 17         | 43208121        | T           | A            |
| rs17608766 | Hypertension       | 17         | 45013271        | T           | C            |
| rs16948048 | Hypertension       | 17         | 47440466        | G           | A            |
| rs11868441 | Nephrosclerosis    | 17         | 59239221        | G           | A            |
| rs8068318  | Nephrosclerosis    | 17         | 59483766        | C           | T            |
| rs7227483  | Nephrosclerosis    | 18         | 43187130        | G           | A            |
| rs8091180  | Nephrosclerosis    | 18         | 77164243        | A           | G            |
| rs12460876 | Nephrosclerosis    | 19         | 33356891        | C           | T            |
| rs11666497 | Nephrosclerosis    | 19         | 38464262        | C           | T            |
| rs3116139  | Glaucoma           | 19         | 51879034        | C           | T            |

| SNP        | Disease          | Chromosome | Position (hg19) | Risk Allele | Other Allele |
|------------|------------------|------------|-----------------|-------------|--------------|
| rs1327235  | Hypertension     | 20         | 10969030        | G           | A            |
| rs6088580  | Nephrosclerosis  | 20         | 33285053        | C           | G            |
| rs6066043  | Nephrosclerosis  | 20         | 45288453        | A           | G            |
| rs17216707 | Nephrosclerosis  | 20         | 52732362        | T           | C            |
| rs6026584  | Nephrosclerosis  | 20         | 57469073        | C           | T            |
| rs6015450  | Hypertension     | 20         | 57751117        | G           | A            |
| rs35934224 | Glaucoma         | 22         | 19872645        | C           | T            |
| rs2239785  | Nephrosclerosis  | 22         | 36661330        | G           | A            |
| rs12484776 | Uterine fibroids | 22         | 40652873        | G           | A            |
