# Supplementary material for: Evidence of selection as a cause for racial disparities in fibroproliferative disease
Source: PubMed Central journal article supplement (PMC5549739; doi:10.1371/journal.pone.0182791), 2017-08-08
Supplement: pone.0182791.s002.pdf [file pone.0182791.s002.pdf]

| SNP        | AFR   | AFR (cont.) | ACB + ASW | EUR   | AMR   | SAS   | EAS   | EA Controls | EA Cases | AA Controls | AA Cases |
|------------|-------|-------------|-----------|-------|-------|-------|-------|-------------|----------|-------------|----------|
| rs6431731  | 0.002 | 0.000       | 0.010     | 0.036 | 0.014 | 0.005 | 0.001 | 0.057       | 0.049    | 0.011       | 0.017    |
| rs1511412  | 0.005 | 0.001       | 0.016     | 0.111 | 0.065 | 0.104 | 0.036 | 0.107       | 0.103    | 0.022       | 0.019    |
| rs6066043  | 0.006 | 0.002       | 0.019     | 0.141 | 0.221 | 0.272 | 0.546 | 0.139       | 0.153    | 0.048       | 0.040    |
| rs11024102 | 0.017 | 0.001       | 0.067     | 0.258 | 0.268 | 0.329 | 0.371 | 0.294       | 0.276    | 0.062       | 0.060    |
| rs3116139  | 0.018 | 0.008       | 0.051     | 0.288 | 0.297 | 0.359 | 0.284 | 0.263       | 0.263    | 0.068       | 0.078    |
| rs16853722 | 0.027 | 0.023       | 0.041     | 0.125 | 0.094 | 0.176 | 0.296 | 0.127       | 0.111    | 0.055       | 0.053    |
| rs1530440  | 0.036 | 0.037       | 0.035     | 0.190 | 0.232 | 0.154 | 0.194 | 0.198       | 0.173    | 0.072       | 0.074    |
| rs7129220  | 0.052 | 0.056       | 0.041     | 0.129 | 0.068 | 0.044 | 0.001 | 0.114       | 0.106    | 0.079       | 0.079    |
| rs9272729  | 0.053 | 0.049       | 0.067     | 0.106 | 0.118 | 0.076 | 0.052 | 0.121       | 0.125    | 0.071       | 0.072    |
| rs17030613 | 0.064 | 0.069       | 0.045     | 0.235 | 0.278 | 0.210 | 0.442 | 0.195       | 0.199    | 0.090       | 0.076    |
| rs12484776 | 0.065 | 0.057       | 0.092     | 0.194 | 0.434 | 0.301 | 0.287 | 0.210       | 0.205    | 0.099       | 0.113    |
| rs12946454 | 0.067 | 0.058       | 0.096     | 0.283 | 0.197 | 0.305 | 0.224 | 0.248       | 0.251    | 0.093       | 0.094    |
| rs11868441 | 0.068 | 0.035       | 0.175     | 0.797 | 0.754 | 0.886 | 0.756 | 0.812       | 0.803    | 0.208       | 0.194    |
| rs1106766  | 0.082 | 0.076       | 0.099     | 0.194 | 0.310 | 0.101 | 0.079 | 0.247       | 0.230    | 0.103       | 0.108    |
| rs1902859  | 0.089 | 0.076       | 0.131     | 0.310 | 0.311 | 0.259 | 0.366 | 0.320       | 0.310    | 0.118       | 0.132    |
| rs13069000 | 0.090 | 0.088       | 0.096     | 0.184 | 0.133 | 0.060 | 0.196 | 0.196       | 0.179    | 0.098       | 0.129    |
| rs1260326  | 0.094 | 0.089       | 0.108     | 0.411 | 0.362 | 0.200 | 0.481 | 0.395       | 0.422    | 0.146       | 0.133    |
| rs316009   | 0.101 | 0.103       | 0.096     | 0.109 | 0.069 | 0.134 | 0.041 | 0.108       | 0.100    | 0.091       | 0.088    |
| rs17367504 | 0.110 | 0.102       | 0.137     | 0.139 | 0.078 | 0.188 | 0.123 | 0.167       | 0.152    | 0.101       | 0.131    |
| rs10277115 | 0.117 | 0.100       | 0.169     | 0.755 | 0.533 | 0.679 | 0.308 | 0.757       | 0.756    | 0.238       | 0.252    |
| rs13209747 | 0.120 | 0.106       | 0.162     | 0.451 | 0.362 | 0.417 | 0.489 | 0.428       | 0.440    | 0.171       | 0.179    |
| rs7759001  | 0.123 | 0.112       | 0.156     | 0.235 | 0.231 | 0.260 | 0.413 | 0.236       | 0.224    | 0.145       | 0.129    |
| rs8091180  | 0.125 | 0.111       | 0.169     | 0.597 | 0.601 | 0.457 | 0.784 | 0.561       | 0.574    | 0.194       | 0.178    |
| rs2745572  | 0.150 | 0.144       | 0.169     | 0.364 | 0.382 | 0.484 | 0.493 | 0.339       | 0.360    | 0.179       | 0.179    |
| rs17428471 | 0.154 | 0.165       | 0.118     | 0.069 | 0.081 | 0.026 | 0.037 | 0.089       | 0.078    | 0.115       | 0.122    |
| rs7601754  | 0.154 | 0.124       | 0.252     | 0.819 | 0.787 | 0.880 | 0.855 | 0.823       | 0.817    | 0.279       | 0.257    |
| rs880315   | 0.165 | 0.159       | 0.185     | 0.357 | 0.513 | 0.398 | 0.636 | 0.341       | 0.348    | 0.195       | 0.174    |
| rs7913069  | 0.166 | 0.174       | 0.143     | 0.038 | 0.117 | 0.069 | 0.085 | 0.021       | 0.019    | 0.156       | 0.138    |
| rs8176743  | 0.169 | 0.176       | 0.150     | 0.084 | 0.048 | 0.233 | 0.194 | 0.062       | 0.074    | 0.158       | 0.166    |
| rs893818   | 0.178 | 0.180       | 0.172     | 0.319 | 0.307 | 0.309 | 0.522 | 0.337       | 0.322    | 0.210       | 0.203    |
| rs12437854 | 0.179 | 0.187       | 0.156     | 0.079 | 0.153 | 0.127 | 0.215 | 0.065       | 0.063    | 0.158       | 0.143    |
| rs873549   | 0.181 | 0.179       | 0.188     | 0.283 | 0.369 | 0.434 | 0.352 | 0.284       | 0.287    | 0.200       | 0.170    |
| rs633185   | 0.196 | 0.199       | 0.185     | 0.277 | 0.421 | 0.500 | 0.484 | 0.271       | 0.294    | 0.235       | 0.222    |

| SNP        | AFR   | AFR (cont.) | ACB + ASW | EUR   | AMR   | SAS   | EAS   | EA Controls | EA Cases | AA Controls | AA Cases |
|------------|-------|-------------|-----------|-------|-------|-------|-------|-------------|----------|-------------|----------|
| rs11656696 | 0.201 | 0.199       | 0.207     | 0.414 | 0.337 | 0.249 | 0.489 | 0.416       | 0.421    | 0.241       | 0.247    |
| rs6015450  | 0.205 | 0.202       | 0.213     | 0.127 | 0.059 | 0.051 | 0.000 | 0.124       | 0.124    | 0.187       | 0.187    |
| rs11222084 | 0.209 | 0.209       | 0.207     | 0.330 | 0.330 | 0.217 | 0.022 | 0.366       | 0.352    | 0.225       | 0.221    |
| rs2233287  | 0.213 | 0.218       | 0.194     | 0.082 | 0.091 | 0.047 | 0.003 | 0.082       | 0.083    | 0.182       | 0.172    |
| rs10994860 | 0.222 | 0.216       | 0.242     | 0.202 | 0.110 | 0.200 | 0.047 | 0.174       | 0.172    | 0.230       | 0.206    |
| rs2521501  | 0.223 | 0.218       | 0.239     | 0.319 | 0.183 | 0.232 | 0.095 | 0.304       | 0.299    | 0.237       | 0.226    |
| rs10032549 | 0.225 | 0.205       | 0.287     | 0.516 | 0.484 | 0.337 | 0.273 | 0.536       | 0.528    | 0.272       | 0.260    |
| rs6795744  | 0.231 | 0.222       | 0.258     | 0.158 | 0.133 | 0.037 | 0.081 | 0.154       | 0.152    | 0.223       | 0.202    |
| rs9663362  | 0.232 | 0.225       | 0.255     | 0.528 | 0.369 | 0.488 | 0.300 | 0.523       | 0.531    | 0.283       | 0.298    |
| rs4656461  | 0.256 | 0.261       | 0.242     | 0.141 | 0.135 | 0.043 | 0.009 | 0.125       | 0.115    | 0.218       | 0.208    |
| rs9296015  | 0.266 | 0.266       | 0.268     | 0.220 | 0.236 | 0.194 | 0.299 | 0.197       | 0.176    | 0.240       | 0.221    |
| rs12136063 | 0.269 | 0.256       | 0.309     | 0.689 | 0.818 | 0.714 | 0.957 | 0.714       | 0.704    | 0.351       | 0.341    |
| rs12460876 | 0.270 | 0.255       | 0.319     | 0.423 | 0.375 | 0.445 | 0.639 | 0.387       | 0.403    | 0.285       | 0.273    |
| rs11123170 | 0.278 | 0.285       | 0.258     | 0.394 | 0.367 | 0.471 | 0.333 | 0.373       | 0.383    | 0.312       | 0.292    |
| rs11959928 | 0.287 | 0.289       | 0.280     | 0.451 | 0.395 | 0.377 | 0.174 | 0.432       | 0.441    | 0.305       | 0.334    |
| rs9682041  | 0.291 | 0.308       | 0.236     | 0.121 | 0.111 | 0.163 | 0.060 | 0.121       | 0.121    | 0.260       | 0.253    |
| rs7172677  | 0.293 | 0.290       | 0.303     | 0.301 | 0.246 | 0.267 | 0.201 | 0.269       | 0.266    | 0.298       | 0.280    |
| rs3828890  | 0.296 | 0.295       | 0.299     | 0.124 | 0.140 | 0.055 | 0.032 | 0.115       | 0.101    | 0.315       | 0.306    |
| rs6088580  | 0.311 | 0.302       | 0.341     | 0.465 | 0.314 | 0.401 | 0.408 | 0.441       | 0.456    | 0.342       | 0.349    |
| rs10795433 | 0.313 | 0.295       | 0.373     | 0.836 | 0.591 | 0.739 | 0.594 | 0.841       | 0.833    | 0.392       | 0.385    |
| rs8032158  | 0.315 | 0.325       | 0.283     | 0.280 | 0.300 | 0.432 | 0.304 | 0.317       | 0.324    | 0.313       | 0.313    |
| rs7805747  | 0.325 | 0.336       | 0.287     | 0.288 | 0.173 | 0.071 | 0.003 | 0.272       | 0.269    | 0.313       | 0.327    |
| rs3750082  | 0.330 | 0.323       | 0.350     | 0.635 | 0.700 | 0.497 | 0.656 | 0.630       | 0.658    | 0.410       | 0.390    |
| rs881858   | 0.338 | 0.332       | 0.357     | 0.695 | 0.761 | 0.756 | 0.773 | 0.708       | 0.686    | 0.361       | 0.363    |
| rs1015213  | 0.338 | 0.365       | 0.252     | 0.101 | 0.055 | 0.108 | 0.014 | 0.093       | 0.084    | 0.268       | 0.298    |
| rs4972593  | 0.349 | 0.352       | 0.338     | 0.134 | 0.104 | 0.403 | 0.214 | 0.164       | 0.160    | 0.310       | 0.298    |
| rs17536527 | 0.350 | 0.357       | 0.325     | 0.480 | 0.644 | 0.598 | 0.909 | 0.424       | 0.443    | 0.353       | 0.342    |
| rs1394125  | 0.350 | 0.350       | 0.350     | 0.342 | 0.233 | 0.229 | 0.083 | 0.357       | 0.362    | 0.340       | 0.342    |
| rs805303   | 0.357 | 0.341       | 0.408     | 0.633 | 0.572 | 0.698 | 0.631 | 0.624       | 0.638    | 0.410       | 0.420    |
| rs6445055  | 0.362 | 0.380       | 0.306     | 0.174 | 0.278 | 0.205 | 0.339 | 0.161       | 0.162    | 0.332       | 0.348    |
| rs7827545  | 0.370 | 0.352       | 0.427     | 0.335 | 0.398 | 0.460 | 0.673 | 0.320       | 0.311    | 0.352       | 0.362    |
| rs10258482 | 0.398 | 0.415       | 0.344     | 0.258 | 0.208 | 0.191 | 0.009 | 0.272       | 0.288    | 0.357       | 0.350    |
| rs16948048 | 0.408 | 0.434       | 0.325     | 0.371 | 0.244 | 0.140 | 0.211 | 0.363       | 0.386    | 0.402       | 0.373    |

| SNP        | AFR   | AFR (cont.) | ACB + ASW | EUR   | AMR   | SAS   | EAS   | EA Controls | EA Cases | AA Controls | AA Cases |
|------------|-------|-------------|-----------|-------|-------|-------|-------|-------------|----------|-------------|----------|
| rs3825942  | 0.410 | 0.419       | 0.382     | 0.177 | 0.169 | 0.268 | 0.140 | 0.148       | 0.166    | 0.368       | 0.376    |
| rs747782   | 0.424 | 0.437       | 0.385     | 0.193 | 0.170 | 0.163 | 0.259 | 0.204       | 0.202    | 0.386       | 0.403    |
| rs2712184  | 0.442 | 0.427       | 0.490     | 0.572 | 0.627 | 0.457 | 0.533 | 0.567       | 0.591    | 0.488       | 0.486    |
| rs443198   | 0.471 | 0.478       | 0.446     | 0.364 | 0.378 | 0.502 | 0.562 | 0.381       | 0.378    | 0.475       | 0.486    |
| rs6459680  | 0.482 | 0.468       | 0.528     | 0.754 | 0.741 | 0.723 | 0.628 | 0.753       | 0.752    | 0.558       | 0.549    |
| rs3130573  | 0.488 | 0.492       | 0.475     | 0.347 | 0.317 | 0.324 | 0.184 | 0.351       | 0.344    | 0.442       | 0.458    |
| rs2802729  | 0.490 | 0.506       | 0.440     | 0.445 | 0.396 | 0.571 | 0.319 | 0.463       | 0.464    | 0.487       | 0.484    |
| rs6465825  | 0.493 | 0.494       | 0.490     | 0.574 | 0.689 | 0.638 | 0.780 | 0.595       | 0.599    | 0.507       | 0.522    |
| rs1327235  | 0.494 | 0.489       | 0.510     | 0.462 | 0.264 | 0.490 | 0.542 | 0.482       | 0.479    | 0.503       | 0.510    |
| rs1936800  | 0.535 | 0.547       | 0.497     | 0.480 | 0.510 | 0.484 | 0.492 | 0.510       | 0.525    | 0.517       | 0.539    |
| rs2782980  | 0.538 | 0.536       | 0.545     | 0.697 | 0.777 | 0.806 | 0.862 | 0.711       | 0.722    | 0.563       | 0.547    |
| rs419076   | 0.550 | 0.558       | 0.526     | 0.482 | 0.369 | 0.473 | 0.151 | 0.470       | 0.492    | 0.528       | 0.522    |
| rs9810888  | 0.551 | 0.559       | 0.529     | 0.489 | 0.405 | 0.409 | 0.417 | 0.520       | 0.499    | 0.546       | 0.544    |
| rs7583877  | 0.568 | 0.572       | 0.554     | 0.269 | 0.401 | 0.226 | 0.365 | 0.316       | 0.304    | 0.540       | 0.560    |
| rs2071518  | 0.592 | 0.589       | 0.599     | 0.225 | 0.189 | 0.308 | 0.161 | 0.262       | 0.270    | 0.506       | 0.539    |
| rs2453580  | 0.600 | 0.598       | 0.605     | 0.593 | 0.732 | 0.833 | 0.787 | 0.601       | 0.603    | 0.613       | 0.597    |
| rs4744712  | 0.601 | 0.605       | 0.586     | 0.623 | 0.751 | 0.688 | 0.545 | 0.587       | 0.601    | 0.575       | 0.599    |
| rs16833934 | 0.604 | 0.612       | 0.576     | 0.272 | 0.179 | 0.151 | 0.216 | 0.261       | 0.267    | 0.540       | 0.534    |
| rs4373814  | 0.613 | 0.619       | 0.592     | 0.466 | 0.514 | 0.431 | 0.504 | 0.425       | 0.424    | 0.557       | 0.585    |
| rs491567   | 0.617 | 0.617       | 0.615     | 0.203 | 0.404 | 0.276 | 0.531 | 0.226       | 0.221    | 0.567       | 0.546    |
| rs2049805  | 0.617 | 0.599       | 0.675     | 0.523 | 0.689 | 0.547 | 0.757 | 0.519       | 0.508    | 0.633       | 0.629    |
| rs7227483  | 0.620 | 0.622       | 0.615     | 0.745 | 0.741 | 0.805 | 0.845 | 0.735       | 0.714    | 0.635       | 0.612    |
| rs4667594  | 0.623 | 0.631       | 0.599     | 0.512 | 0.647 | 0.488 | 0.135 | 0.541       | 0.543    | 0.603       | 0.574    |
| rs319690   | 0.627 | 0.639       | 0.589     | 0.300 | 0.404 | 0.347 | 0.285 | 0.307       | 0.304    | 0.608       | 0.592    |
| rs12419342 | 0.653 | 0.685       | 0.551     | 0.302 | 0.313 | 0.162 | 0.341 | 0.298       | 0.292    | 0.567       | 0.564    |
| rs13329952 | 0.657 | 0.657       | 0.656     | 0.784 | 0.744 | 0.681 | 0.914 | 0.803       | 0.810    | 0.652       | 0.658    |
| rs7208487  | 0.659 | 0.648       | 0.694     | 0.838 | 0.764 | 0.921 | 0.762 | 0.836       | 0.840    | 0.655       | 0.669    |
| rs3775948  | 0.663 | 0.661       | 0.672     | 0.755 | 0.575 | 0.684 | 0.581 | 0.761       | 0.740    | 0.657       | 0.677    |
| rs889472   | 0.676 | 0.688       | 0.640     | 0.376 | 0.517 | 0.532 | 0.595 | 0.392       | 0.390    | 0.633       | 0.652    |
| rs626277   | 0.689 | 0.706       | 0.634     | 0.417 | 0.587 | 0.629 | 0.876 | 0.407       | 0.382    | 0.649       | 0.652    |
| rs35934224 | 0.691 | 0.686       | 0.707     | 0.846 | 0.856 | 0.814 | 0.967 | 0.841       | 0.839    | 0.725       | 0.721    |
| rs2239785  | 0.694 | 0.716       | 0.621     | 0.219 | 0.160 | 0.162 | 0.204 | 0.217       | 0.195    | 0.636       | 0.639    |
| rs1717027  | 0.704 | 0.717       | 0.662     | 0.191 | 0.186 | 0.173 | 0.149 | 0.174       | 0.172    | 0.632       | 0.639    |

| SNP        | AFR   | AFR (cont.) | ACB + ASW | EUR   | AMR   | SAS   | EAS   | EA Controls | EA Cases | AA Controls | AA Cases |
|------------|-------|-------------|-----------|-------|-------|-------|-------|-------------|----------|-------------|----------|
| rs284491   | 0.719 | 0.740       | 0.650     | 0.341 | 0.416 | 0.272 | 0.406 | 0.328       | 0.341    | 0.647       | 0.673    |
| rs2275247  | 0.720 | 0.730       | 0.688     | 0.050 | 0.367 | 0.241 | 0.766 | 0.038       | 0.037    | 0.633       | 0.638    |
| rs11969985 | 0.741 | 0.739       | 0.745     | 0.851 | 0.833 | 0.859 | 0.822 | 0.848       | 0.862    | 0.763       | 0.738    |
| rs7801190  | 0.750 | 0.742       | 0.774     | 0.946 | 0.937 | 0.956 | 0.998 | 0.957       | 0.954    | 0.785       | 0.777    |
| rs59072263 | 0.756 | 0.749       | 0.777     | 0.858 | 0.911 | 0.880 | 0.908 | 0.849       | 0.853    | 0.782       | 0.775    |
| rs6495122  | 0.775 | 0.796       | 0.710     | 0.470 | 0.512 | 0.873 | 0.818 | 0.429       | 0.432    | 0.726       | 0.708    |
| rs10745332 | 0.783 | 0.789       | 0.764     | 0.756 | 0.865 | 0.879 | 0.811 | 0.741       | 0.752    | 0.784       | 0.774    |
| rs871606   | 0.792 | 0.796       | 0.780     | 0.863 | 0.859 | 0.664 | 0.801 | 0.890       | 0.898    | 0.791       | 0.812    |
| rs1173771  | 0.795 | 0.799       | 0.783     | 0.581 | 0.591 | 0.613 | 0.661 | 0.619       | 0.607    | 0.767       | 0.775    |
| rs2725220  | 0.801 | 0.817       | 0.752     | 0.486 | 0.395 | 0.405 | 0.241 | 0.490       | 0.481    | 0.744       | 0.736    |
| rs8068318  | 0.803 | 0.818       | 0.755     | 0.272 | 0.579 | 0.529 | 0.632 | 0.277       | 0.284    | 0.688       | 0.728    |
| rs381815   | 0.810 | 0.812       | 0.806     | 0.705 | 0.710 | 0.872 | 0.842 | 0.742       | 0.719    | 0.808       | 0.796    |
| rs228611   | 0.812 | 0.819       | 0.787     | 0.518 | 0.683 | 0.403 | 0.514 | 0.529       | 0.525    | 0.750       | 0.739    |
| rs2279463  | 0.814 | 0.806       | 0.841     | 0.872 | 0.934 | 0.916 | 0.918 | 0.870       | 0.868    | 0.810       | 0.815    |
| rs6420094  | 0.815 | 0.821       | 0.793     | 0.668 | 0.721 | 0.698 | 0.787 | 0.682       | 0.674    | 0.804       | 0.776    |
| rs6026584  | 0.818 | 0.829       | 0.780     | 0.665 | 0.719 | 0.752 | 0.748 | 0.666       | 0.658    | 0.783       | 0.789    |
| rs4014195  | 0.819 | 0.812       | 0.841     | 0.649 | 0.785 | 0.654 | 0.763 | 0.659       | 0.672    | 0.792       | 0.792    |
| rs807601   | 0.822 | 0.832       | 0.787     | 0.323 | 0.434 | 0.561 | 0.783 | 0.356       | 0.353    | 0.739       | 0.757    |
| rs2487032  | 0.833 | 0.844       | 0.796     | 0.498 | 0.484 | 0.560 | 0.492 | 0.502       | 0.496    | 0.761       | 0.776    |
| rs9313772  | 0.846 | 0.858       | 0.806     | 0.664 | 0.650 | 0.629 | 0.830 | 0.621       | 0.622    | 0.813       | 0.816    |
| rs4619890  | 0.859 | 0.875       | 0.806     | 0.466 | 0.597 | 0.619 | 0.704 | 0.476       | 0.477    | 0.824       | 0.824    |
| rs10937329 | 0.866 | 0.873       | 0.844     | 0.681 | 0.736 | 0.813 | 0.606 | 0.700       | 0.684    | 0.822       | 0.837    |
| rs11014166 | 0.867 | 0.866       | 0.869     | 0.678 | 0.784 | 0.708 | 0.880 | 0.666       | 0.669    | 0.845       | 0.854    |
| rs17080102 | 0.880 | 0.876       | 0.892     | 0.930 | 0.806 | 0.831 | 0.920 | 0.933       | 0.934    | 0.900       | 0.897    |
| rs198846   | 0.881 | 0.880       | 0.885     | 0.822 | 0.865 | 0.926 | 0.965 | 0.835       | 0.838    | 0.891       | 0.884    |
| rs12416687 | 0.887 | 0.896       | 0.857     | 0.746 | 0.814 | 0.925 | 0.821 | 0.751       | 0.748    | 0.853       | 0.856    |
| rs479777   | 0.914 | 0.923       | 0.885     | 0.660 | 0.634 | 0.778 | 0.834 | 0.693       | 0.647    | 0.879       | 0.855    |
| rs16849225 | 0.914 | 0.923       | 0.885     | 0.775 | 0.800 | 0.712 | 0.595 | 0.766       | 0.770    | 0.891       | 0.882    |
| rs11864909 | 0.927 | 0.932       | 0.911     | 0.706 | 0.718 | 0.690 | 0.866 | 0.723       | 0.727    | 0.889       | 0.882    |
| rs10767873 | 0.929 | 0.941       | 0.892     | 0.502 | 0.588 | 0.743 | 0.672 | 0.529       | 0.549    | 0.864       | 0.872    |
| rs12711490 | 0.930 | 0.940       | 0.898     | 0.805 | 0.831 | 0.944 | 0.926 | 0.781       | 0.769    | 0.899       | 0.893    |
| rs504915   | 0.935 | 0.959       | 0.857     | 0.287 | 0.585 | 0.389 | 0.781 | 0.313       | 0.313    | 0.847       | 0.818    |
| rs2280543  | 0.935 | 0.933       | 0.943     | 0.967 | 0.961 | 0.895 | 0.845 | 0.952       | 0.956    | 0.935       | 0.937    |

| SNP        | AFR   | AFR (cont.) | ACB + ASW | EUR   | AMR   | SAS   | EAS   | EA Controls | EA Cases | AA Controls | AA Cases |
|------------|-------|-------------|-----------|-------|-------|-------|-------|-------------|----------|-------------|----------|
| rs164748   | 0.937 | 0.952       | 0.885     | 0.523 | 0.672 | 0.805 | 0.984 | 0.549       | 0.554    | 0.886       | 0.882    |
| rs163160   | 0.938 | 0.942       | 0.927     | 0.821 | 0.813 | 0.742 | 0.792 | 0.823       | 0.819    | 0.907       | 0.933    |
| rs11666497 | 0.940 | 0.940       | 0.940     | 0.805 | 0.857 | 0.794 | 0.890 | 0.800       | 0.810    | 0.924       | 0.929    |
| rs17477177 | 0.941 | 0.947       | 0.920     | 0.777 | 0.843 | 0.701 | 0.864 | 0.801       | 0.800    | 0.924       | 0.924    |
| rs3753841  | 0.951 | 0.980       | 0.857     | 0.388 | 0.245 | 0.414 | 0.297 | 0.369       | 0.396    | 0.820       | 0.868    |
| rs17830558 | 0.959 | 0.985       | 0.876     | 0.466 | 0.713 | 0.746 | 0.656 | 0.445       | 0.468    | 0.887       | 0.882    |
| rs1446468  | 0.961 | 0.978       | 0.908     | 0.488 | 0.667 | 0.596 | 0.462 | 0.474       | 0.470    | 0.864       | 0.883    |
| rs1044261  | 0.962 | 0.964       | 0.955     | 0.934 | 0.957 | 0.993 | 1.000 | 0.917       | 0.929    | 0.960       | 0.954    |
| rs17216707 | 0.965 | 0.974       | 0.936     | 0.773 | 0.648 | 0.785 | 0.957 | 0.817       | 0.804    | 0.918       | 0.931    |
| rs820430   | 0.980 | 0.993       | 0.940     | 0.610 | 0.627 | 0.623 | 0.329 | 0.618       | 0.598    | 0.920       | 0.911    |
| rs10513801 | 0.988 | 0.994       | 0.968     | 0.862 | 0.921 | 0.875 | 0.937 | 0.872       | 0.870    | 0.958       | 0.959    |
| rs17608766 | 0.990 | 0.999       | 0.962     | 0.826 | 0.942 | 0.958 | 0.999 | 0.876       | 0.872    | 0.979       | 0.977    |
| rs3213787  | 0.990 | 0.988       | 0.997     | 0.967 | 0.863 | 0.894 | 0.864 | 0.961       | 0.959    | 0.989       | 0.988    |
| rs267734   | 0.993 | 0.997       | 0.981     | 0.806 | 0.906 | 0.946 | 0.974 | 0.799       | 0.798    | 0.960       | 0.954    |
| rs3850625  | 0.995 | 1.000       | 0.978     | 0.882 | 0.912 | 0.802 | 0.960 | 0.878       | 0.889    | 0.983       | 0.981    |
